# Supplementary material
Source: publisher site journal article supplement (https://www.dovepress.com/get_supplementary_file.php?f=342673.docx)
Supplement: Supplementary file 1 [file get_supplementary_file.php]

**Supplementary File 1: The definitions of network properties and their computations**

**Small-worldness:** Defined by clustering coefficient (Cp) and shortest path length (Lp); network clustering coefficient Creal is larger than random network clustering coefficient Crandom (γ= Creal/Crandom, γ> 1); characteristic path length Lreal is equal to random network length Lrandom (λ= Lreal/Lrandom, λ≈ 1); or σ= λ / γ> 1, the network is considered to have small-worldness. Crandom is the average clustering coefficient of 500 random networks. Lrandom is the average shortest path length of 500 random networks.

**Global efficiency:** the reciprocal average of the shortest path length between each pair of nodes in the whole brain network. Global efficiency measures the information transmission ability between network nodes. The equation is as follows: Eglobal=1/N(N-1)*Σi,j,i≠j*(1/dij), where N is the number of nodes, and dij represents the distance between node i and node j.

**Local efficiency:** the local efficiency of the whole brain network is the global efficiency of each sub-network (Gi). The equation is as follows: Elocal(i)= Eglobal(Gi). Local efficiency also measures the information transmission capacity of nodes within the network.

**Cp:** the ratio of the number of edges between "other nodes" directly connected to node i in the network to the maximum number of possible edges between these "other nodes". The equation is as follows: Ci=Ei/ki(ki-1). Ei represents the number of edges between "other nodes" directly connected to node i, and Ki represents the connectivity of node i. ki(ki-1) is the maximum number of edges of "other nodes". Ci measures the collective degree of this node.

**Lp:** the shortest path length of node i. The equation is as follows: Li=*Σi≠j∈G*Li,j, where Lij represents the shortest path between node i and node j. This indicator measures the tightness of the network connection.

**Assortativity:** used to examine whether nodes with similar values tend to be connected.

**Nodal Efficiency:** global efficiency of Node i. The equation is as follows: Eglob_i=(1/N-1)*Σ(1/Li,j). Lij represents the shortest path between node i and node j, which reflects the information transmission ability of the node in the network. Larger Eglob_i values indicate information transfer between this node and other nodes.

**Nodal Local Efficiency:** local efficiency of Node i. The equation is as follows: Eloc_i=1/NGi(NGi-1)*Σj,k∈Gi*(1/Li,j). Gi is the sub-network composed of "other nodes" directly connected by node I; NGi is the total number of nodes in the subnetwork; and Lj,k represents the shortest path between nodes j and k.

**Degree centrality:** the number of edges shared by node i with other nodes in the network. The equation is as follows: Ki=1/n∑ki. Ki is the centrality value of node I and measures the importance of a single node in the network.

**Betweenness centrality:** the number of shortest paths through a particular node among all other node pairs in the network. The equation is as follows: Nbc(i)= Σj≠i≠k∈G*. δjk represents the number of shortest paths between any two nodes in the connected network except node i; δjk(i) is the number of paths passing through node i in the shortest path between any two nodes. This measures the importance of the node in the network.
